# Supplementary material for: Stöber synthesis of salen-formaldehyde resin polymer- and carbon spheres with high nitrogen content and application of the corresponding Mn-containing carbon spheres as efficient electrocatalysts for the oxygen reduction reaction
Source: Royal Society of Chemistry journal article supplement (doi:10.1039/d0ra03815f), 2020-01-01
Supplement: d0ra03815f1.pdf [file d0ra03815f1.pdf]

## Supplementary Material

### **Stöber synthesis of salen-formaldehyde resin polymer- and carbon spheres with high nitrogen content and application of the corresponding Mn-containing carbon spheres as efficient electrocatalysts for the oxygen reduction reaction**

Tahereh Hosseinzadeh Sanatkar,<sup>a</sup> Alireza Khorshidi,<sup>\*a</sup> Rouhollah Yaghoubi,<sup>b</sup> Esmail Sohoul,<sup>c</sup> and Jamaladin Shakeri<sup>d</sup>

<sup>a</sup> *Department of Chemistry, Faculty of Sciences, University of Guilan, 41335-1914, Rasht, Guilan, Iran*

<sup>b</sup> *Department of Chemistry, Faculty of Science, Tarbiat Modares University, Tehran, Iran*

<sup>c</sup> *Young Researchers and Elites Club, Science and Research Branch, Islamic Azad University, Tehran, Iran*

<sup>d</sup> *Department of Chemistry, Isfahan University of Technology, Isfahan, 84156-83111, Iran*

\* Corresponding author Tel.: +98-13-33367262; fax: +98-13-33367066

E-mail address: [khorshidi@guilan.ac.ir](mailto:khorshidi@guilan.ac.ir)

**Keywords:** Schiff base; Stöber method; carbon spheres; oxygen reduction reaction

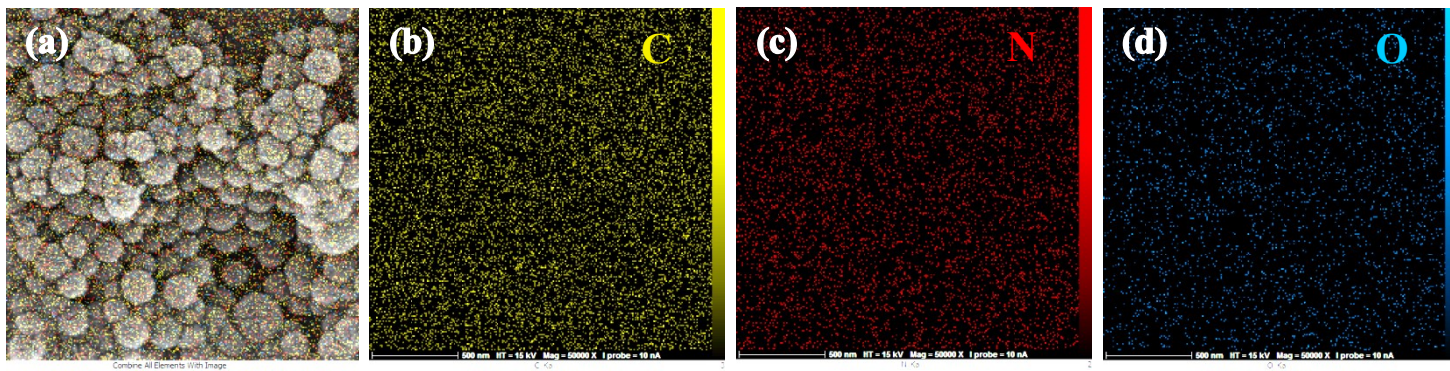

**Fig. S1.** (a) Elemental mapping analysis of all, (b) C, (c) N, and (d) O elements of the SF-C resin spheres.

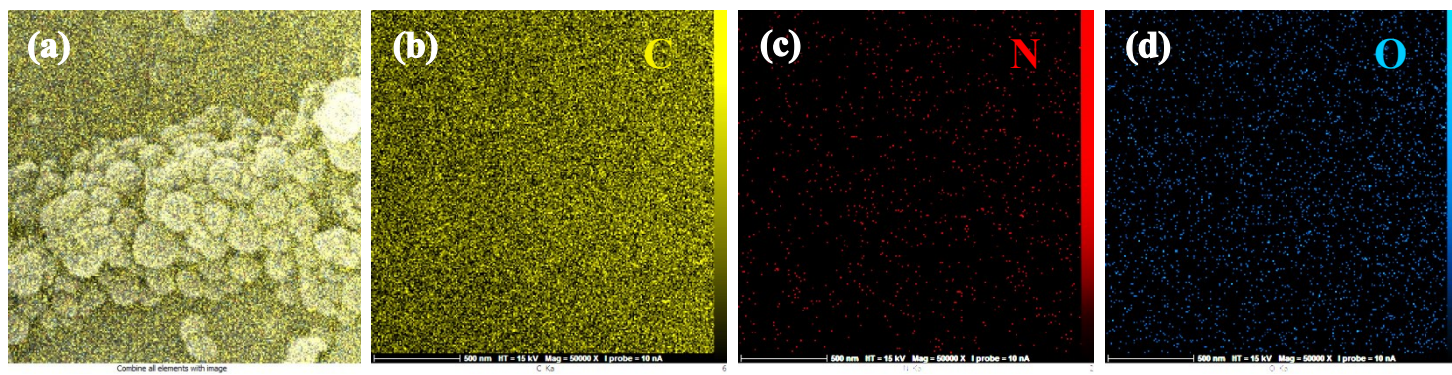

**Fig. S2.** (a) Elemental mapping analysis of all, (b) C, (c) N, and (d) O elements of the SF-P-C carbon spheres.
